# Supplementary material
Source: PubMed Central journal article supplement (PMC6706299)
Supplement: NIHMS1528627-supplement-Supplemental_Data_File_1__HR_Infant_Procedures.pdf [file NIHMS1528627-supplement-Supplemental_Data_File_1__HR_Infant_Procedures.pdf]

## **Text, Supplemental Digital Content 1**

*Human-reared infant procedures.* HR infants were fed Similac Sensitive® with OptiGro, which contains prebiotics. Formula was prepared fresh by animal care staff and was mixed according to the manufacturer's instructions. Following a soak in warm water with disinfectant, used bottles and nipples were cleaned using under hot water with a bottlebrush and were sanitized daily. HR infants started with bottle-feeding 60mL of formula 6 times daily for 2 weeks, progressing to ad libitum self-feeding from a mounted bottle. HR infants were introduced to chow soaked in formula and small pieces of fruit at 2 weeks of age. At one month, HR infants were paired with another HR infant and transferred to a stainless-steel cage. At day 30, infants were now given a bottle 5 times daily and were progressively weaned from formula by 2 months.
