# Supplementary material
Source: PubMed Central journal article supplement (PMC6706299)
Supplement: NIHMS1528627-supplement-Supplemental_Data_File_2__Sequencing_Methods.pdf [file NIHMS1528627-supplement-Supplemental_Data_File_2__Sequencing_Methods.pdf]

## **Text, Supplemental Digital Content 2**

*Specimen Collection, Isolation of Bacterial DNA, and Sequence Analysis.* Rectal swabs were obtained between 0930-1130 at 2, 4 or 8 weeks of age. A small quantity of fecal matter was sampled using the BBL™ CultureSwab™ Collection & Transport System swab/tube (Becton Dickinson) and stored at <-60 °C. Extraction of genomic DNA was performed using the PowerSoil DNA Isolation Kit (MoBio, Carlsbad, CA). Purified genomic extracts were quantified using a Qubit 2.0 Fluorometer (Life Technologies, Carlsbad, CA), and stored at -20 °C in 10 mM Tris buffer until sequenced. PCR amplification of the V4 variable region of the 16S rRNA gene using variable region-specific primers (515F-806R) and amplicon sequencing were performed on an Illumina MiSeq by the Argonne National Laboratory (Lamont, IL). Each sample generated an average 30,597 sequences. Sequences were de-multiplexed and quality filtered through QIIME default settings, and closed reference operational taxonomic unit (OTU) picking was conducted using the GreenGenes 13\_8 reference database (19) to classify and group unique sequences into OTUs based on 97% nucleotide sequence identity. OTUs with fewer than 15 reads, and two samples with fewer than 1,000 filtered sequences, were excluded from further analysis.
