# Supplementary material
Source: PubMed Central journal article supplement (PMC6706299)
Supplement: NIHMS1528627-supplement-Supplemental_Data_File_3__MR_Serial_Analysis_of_Bacteria.pdf [file NIHMS1528627-supplement-Supplemental_Data_File_3__MR_Serial_Analysis_of_Bacteria.pdf]

### **Text, Supplemental Digital Content 3**

*Analysis 2: Serial evaluation of MR infants.* Seventeen MR infants were sampled at all 3 age points permitting a serial analysis of developmental change within each infant. Linear mixed effect modeling revealed that community richness was characterized by an increase in diversity that stabilized at 8 weeks ( $F(2,16)=3.175, p=0.055$ ). However, there was no difference in beta diversity over time. Despite the relative stability of these diversity indices, the relative abundance of genera did change. *Prevotella*, the most common genera, increased to 22.8% ( $F(2,32)=3.29; p=0.05$ ), with higher levels at 8 weeks than at 2 and 4 weeks ( $p=0.053; p=0.011$ , respectively). *Bifidobacteria* were second most abundant, comprising an average 15.5% of identified taxa, and the levels were stable during active nursing. *Lactobacillus* abundance diverged, increasing to 6.7% by 4 weeks of age, but decreased by nearly half as other taxa became prominent at 8 weeks ( $F(2,32)=5.82, p=0.007$ ). KEGG orthologs analyses did not identify any age-related predictions in microbial gene function that survived correction for FDR in this smaller subset of MR infants.
