# Supplementary material
Source: PubMed Central journal article supplement (PMC6706299)
Supplement: NIHMS1528627-supplement-Supplemental_Data_File_4__Infant_Recruitment_Descriptives.pdf [file NIHMS1528627-supplement-Supplemental_Data_File_4__Infant_Recruitment_Descriptives.pdf]

**Table, Supplemental Digital Content 4. Infant Recruitment Descriptives**

| <b>Age</b> | <b>Total</b> |    | <b>Female Infants</b> |    | <b>Male Infants</b> |    |
|------------|--------------|----|-----------------------|----|---------------------|----|
|            | MR           | HR | MR                    | HR | MR                  | HR |
| 2 weeks    | 34           | 16 | 20                    | 8  | 14                  | 8  |
| 4 weeks    | 21           | 5  | 12                    | 2  | 9                   | 3  |
| 8 weeks    | 19           | 7  | 12                    | 3  | 7                   | 4  |
