# Supplementary material
Source: PubMed Central journal article supplement (PMC6706299)
Supplement: NIHMS1528627-supplement-Supplemental_Data_File_5__Alpha_Diversity_Indices_Table.pdf [file NIHMS1528627-supplement-Supplemental_Data_File_5__Alpha_Diversity_Indices_Table.pdf]

**Table, Supplemental Digital Content 5.** Alpha Diversity Metrics

| <b>Alpha Diversity Metrics</b> | <b>2 Weeks</b> |         |         | <b>4 Weeks</b> |         |         | <b>8 Weeks</b> |         |         |
|--------------------------------|----------------|---------|---------|----------------|---------|---------|----------------|---------|---------|
|                                | <i>p</i>       | MR Mean | HR Mean | <i>p</i>       | MR Mean | HR Mean | <i>p</i>       | MR Mean | HR Mean |
| Faith's Phylogenetic Diversity | 0.83           | 31.50   | 32.27   | 0.58           | 30.63   | 27.60   | 0.85           | 28.52   | 29.12   |
| Chao1 Index                    | 0.57           | 489.11  | 531.41  | 0.72           | 457.97  | 494.25  | 0.17           | 437.79  | 528.32  |
| Observed OTUs                  | 0.56           | 420.12  | 453.19  | 0.72           | 403.71  | 431.80  | 0.26           | 390.84  | 448.86  |
